# Supplementary material for: Spectroscopic signatures and structural motifs in isolated and hydrated caffeine: a computational study
Source: Royal Society of Chemistry journal article supplement (doi:10.1039/c4ra09749a), 2014-01-01
Supplement: c4ra09749a1.pdf [file c4ra09749a1.pdf]

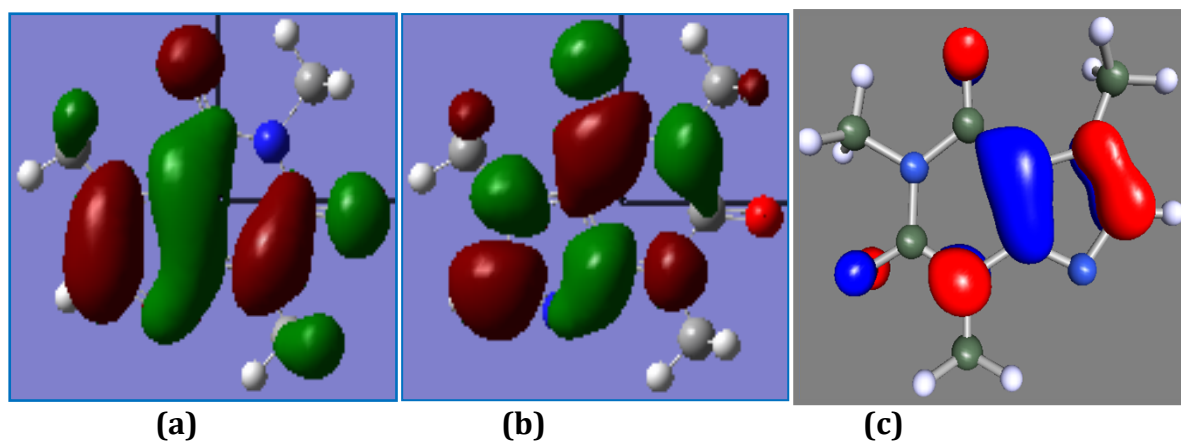

**Fig. S1. (a) HOMO (b) LUMO of bare caffeine A using GAUSSIAN 09 and (c) HOMO of caffeine A with TURBOMOLE 6.4 Software calculated at MP2/6-311++G(d,p) level.**

| Relative energy (kJ/mol) | (0.00)                                                                                 | (0.00)                                                                                  | (0.86)                                                                                   | (0.86)                                                                                   | (1.94)                                                                                   |
|--------------------------|----------------------------------------------------------------------------------------|-----------------------------------------------------------------------------------------|------------------------------------------------------------------------------------------|------------------------------------------------------------------------------------------|------------------------------------------------------------------------------------------|
| Structure                | <br>I | <br>II | <br>III | <br>IV | <br>V |

Fig. S2 Optimized structures and relative energies (kJ/mol) of the lowest-energy caff<sub>1</sub>-(H<sub>2</sub>O)<sub>2</sub> complexes at B3LYP/6-31+G(d) level.
