# Supplementary material for: Spectroscopic signatures and structural motifs in isolated and hydrated caffeine: a computational study
Source: Royal Society of Chemistry journal article supplement (doi:10.1039/c4ra09749a), 2014-01-01
Supplement: c4ra09749a2.pdf [file c4ra09749a2.pdf]

**Table S 1** Calculated total electronic energies (A.U), relative energies (kJ/mol) in parenthesis and dipole moment (Debye) of gaseous caffeine conformers.

| Caffeine<br>Conformers/<br>Rotamers | MP2 Value    | DFT Values   |              |              |              |              |
|-------------------------------------|--------------|--------------|--------------|--------------|--------------|--------------|
|                                     |              | M06          | M06-2X       | X3LYP        | B3PW91       | B3LYP        |
| <b>Conformer (A)</b>                | -678.7120497 | -680.1279761 | -680.2987337 | -680.2748490 | -680.2995226 | -680.5638739 |
|                                     | (0.0)        | (0.0)        | (0.0)        | (0.0)        | (0.0)        | (0.0)        |
|                                     | 4.603        | 3.981        | 3.977        | 4.025        | 4.008        | 4.017        |
| <b>Conformer (B)</b>                | -678.7116155 | -680.1277964 | -680.2983148 | -680.2745869 | -680.2992887 | -680.5635797 |
|                                     | (1.14)       | (0.47)       | (1.09)       | (0.69)       | (0.61)       | (0.77)       |
|                                     | 4.570        | 3.953        | 3.977        | 3.995        | 3.978        | 3.984        |
| <b>Conformer (C)</b>                | -678.7109422 | -680.1272614 | -680.2978019 | -680.2741104 | -680.2987934 | -680.5631061 |
|                                     | (2.91)       | (1.87)       | (2.44)       | (1.94)       | (1.91)       | (2.01)       |
|                                     | 4.599        | 3.943        | 4.011        | 3.992        | 3.984        | 3.986        |
| <b>Conformer (D)</b>                | -678.7107405 | -680.1270058 | -680.2976344 | -680.2741721 | -680.2989309 | -680.5631602 |
|                                     | (3.43)       | (2.55)       | (2.88)       | (1.78)       | (1.55)       | (1.87)       |
|                                     | 4.609        | 3.906        | 3.996        | 3.970        | 3.945        | 3.961        |
| <b>Conformer (E)</b>                | -678.7103569 | -680.1268486 | -680.2972702 | -680.2739267 | -680.2987085 | -680.5629187 |
|                                     | (4.44)       | (2.96)       | (3.84)       | (2.96)       | (2.14)       | (2.51)       |
|                                     | 4.577        | 3.876        | 3.994        | 3.942        | 3.915        | 3.929        |
| <b>Conformer (F)</b>                | -678.7097658 | -680.1263391 | -680.2968476 | -680.2734900 | -680.2982505 | -680.5624830 |
|                                     | (5.99)       | (4.29)       | (4.95)       | (3.56)       | (3.34)       | (3.65)       |
|                                     | 4.601        | 3.87         | 4.02         | 3.94         | 3.92         | 3.93         |

**Table S 2** Selected structural parameters of the most stable conformers of caffeine

| Structural Parameters | Experimental value* | Calculated value at MP2/6-311++G(d,p) level |             |             |             |             |
|-----------------------|---------------------|---------------------------------------------|-------------|-------------|-------------|-------------|
|                       |                     | Conformer A                                 | Conformer B | Conformer C | Conformer D | Conformer E |
| Bond lengths (Å)      |                     |                                             |             |             |             |             |
| N1-C2                 | 1.410               | 1.4119                                      | 1.4138      | 1.4171      | 1.4117      | 1.4137      |
| C2-N3                 | 1.383               | 1.3831                                      | 1.3867      | 1.3876      | 1.3816      | 1.3852      |
| N3-C4                 | 1.376               | 1.3768                                      | 1.3754      | 1.3758      | 1.3770      | 1.3755      |
| C4-C5                 | 1.382               | 1.3870                                      | 1.3859      | 1.3853      | 1.3882      | 1.3871      |
| C5-C6                 | 1.446               | 1.4378                                      | 1.4373      | 1.4364      | 1.4404      | 1.4399      |
| C6-N1                 | 1.408               | 1.4101                                      | 1.4105      | 1.4074      | 1.4092      | 1.4099      |
| C5-N7                 | 1.373               | 1.3745                                      | 1.3738      | 1.3735      | 1.3768      | 1.3760      |
| N7-C8                 | 1.362               | 1.3637                                      | 1.3644      | 1.3647      | 1.3630      | 1.3638      |
| C8-N9                 | 1.297               | 1.3377                                      | 1.3382      | 1.3381      | 1.3374      | 1.3380      |
| N9-C4                 | 1.359               | 1.3591                                      | 1.3591      | 1.3595      | 1.3587      | 1.3587      |
| N1-C10                | 1.464               | 1.4659                                      | 1.4664      | 1.4671      | 1.4663      | 1.4667      |
| C2-O11                | 1.204               | 1.2241                                      | 1.2233      | 1.2229      | 1.2243      | 1.2234      |
| N3-C12                | 1.458               | 1.4608                                      | 1.4604      | 1.4609      | 1.4609      | 1.4603      |
| C6-O13                | 1.209               | 1.2279                                      | 1.2277      | 1.2282      | 1.2287      | 1.2285      |
| N7-C14                | 1.456               | 1.4591                                      | 1.4592      | 1.4590      | 1.4638      | 1.4637      |
| C8-H1                 | 1.085               | 1.0819                                      | 1.0819      | 1.0820      | 1.0821      | 1.0821      |
| Bond Angles (°)       |                     |                                             |             |             |             |             |
| C2-N1-C6              | 127.8               | 127.5317                                    | 127.9410    | 127.9877    | 127.6807    | 128.1016    |
| N1-C2-N3              | 116.5               | 116.9223                                    | 116.4823    | 115.8493    | 116.7886    | 116.3358    |
| C2-N3-C4              | 120.3               | 120.0060                                    | 119.8588    | 120.3406    | 120.0362    | 119.8892    |
| N3-C4-C5              | 121.5               | 121.0858                                    | 121.6437    | 121.7183    | 121.3712    | 121.9381    |
| C4-C5-C6              | 122.9               | 123.8839                                    | 123.5615    | 123.0270    | 123.4024    | 123.0962    |
| C5-C6-N1              | 111.0               | 110.5700                                    | 110.5126    | 111.0770    | 110.7209    | 110.6391    |
| N9-C4-C5              | 111.6               | 111.8876                                    | 112.0082    | 111.9608    | 111.9463    | 112.0739    |
| C4-C5-N7              | 104.7               | 105.3180                                    | 105.2978    | 105.3635    | 105.1540    | 105.1392    |
| C5-N7-C8              | 105.6               | 106.9889                                    | 105.9938    | 105.9756    | 106.0535    | 106.0516    |
| N7-C8-N9              | 114.2               | 113.3834                                    | 113.3857    | 113.3573    | 113.3851    | 113.3941    |
| C8-N9-C4              | 103.8               | 103.4220                                    | 103.3146    | 103.3429    | 103.4610    | 103.3411    |
| C5-C6-O13             | 125.9               | 126.0385                                    | 126.0561    | 126.8456    | 126.3374    | 126.3711    |
| O13-C6-N1             | -                   | 123.3914                                    | 123.4313    | 122.0774    | 122.9417    | 122.9898    |
| C6-N1-C10             | -                   | 118.0901                                    | 117.8570    | 114.8561    | 118.0360    | 117.7991    |
| C10-N1-C2             | 114.4               | 114.3781                                    | 114.2020    | 117.1561    | 114.2833    | 114.0994    |
| N1-C2-O11             | -                   | 121.0623                                    | 120.4011    | 121.6562    | 121.0884    | 120.4326    |
| O11-C2-N3             | 122.2               | 122.0154                                    | 123.1165    | 122.4944    | 122.1228    | 123.2315    |
| C2-N3-C12             | -                   | 118.0487                                    | 120.4150    | 120.2523    | 118.0297    | 120.4129    |
| C12-N3-C4             | 121.8               | 121.9449                                    | 119.7261    | 119.4071    | 121.9341    | 119.6979    |
| N3-C4-N9              | -                   | 127.0266                                    | 126.3481    | 126.3209    | 126.6825    | 125.9880    |
| N9-C8-H1              | -                   | 125.0220                                    | 125.0588    | 125.0772    | 124.9324    | 124.9674    |
| H1-C8-N7              | -                   | 121.5945                                    | 121.5555    | 121.5655    | 121.6825    | 121.6385    |
| C8-N7-C14             | -                   | 127.2189                                    | 127.2355    | 127.3079    | 126.6690    | 126.7263    |
| C14-N7-C5             | 126.7               | 126.7921                                    | 126.7707    | 126.7165    | 127.2775    | 127.2221    |
| N7-C5-C6              | -                   | 130.7980                                    | 131.1408    | 131.6095    | 131.4435    | 131.7646    |

\* T. Egawa, A. Kamiya, H. Takeuchi, S. Konaka, *J. Mol. Struct.* 825 (2006) 151–157.

**Table S 3.** Calculated NBO Charges of the most stable conformers of caffeine at MP2/6-311++G(d,p) level.

| Atom No.   | NBO Charge  |             |             |             |             |             |
|------------|-------------|-------------|-------------|-------------|-------------|-------------|
|            | Conformer A | Conformer B | Conformer C | Conformer D | Conformer E | Conformer F |
| <b>O11</b> | -0.731      | -0.736      | -0.741      | -0.732      | -0.736      | -0.741      |
| <b>O13</b> | -0.726      | -0.725      | -0.720      | -0.732      | -0.730      | -0.725      |
| <b>N1</b>  | -0.624      | -0.626      | -0.626      | -0.623      | -0.625      | -0.626      |
| <b>N3</b>  | -0.578      | -0.580      | -0.581      | -0.578      | -0.579      | -0.580      |
| <b>N7</b>  | -0.443      | -0.442      | -0.443      | -0.447      | -0.447      | -0.447      |
| <b>N9</b>  | -0.610      | -0.602      | -0.601      | -0.603      | -0.597      | -0.596      |
| <b>C2</b>  | 1.015       | 1.019       | 1.023       | 1.015       | 1.019       | 1.023       |
| <b>C4</b>  | 0.477       | 0.472       | 0.472       | 0.471       | 0.467       | 0.467       |
| <b>C5</b>  | -0.084      | -0.081      | -0.080      | -0.078      | -0.075      | -0.073      |
| <b>C6</b>  | 0.821       | 0.822       | 0.818       | 0.823       | 0.823       | 0.819       |

**Table S4** Selected ground state vibrational stretching frequencies ( $\text{cm}^{-1}$ ) and IR intensity with tentative vibrational assignments of the most stable conformers of caffeine .

| Assignment                                 | Calculated values at B3LYP/6-311++G(d,p) level |               |               |               |               |
|--------------------------------------------|------------------------------------------------|---------------|---------------|---------------|---------------|
|                                            | Conformer (A)                                  | Conformer (B) | Conformer (C) | Conformer (D) | Conformer (E) |
| NH str.                                    | 3225 (2)                                       | 3225 (2)      | 3225 (2)      | 3223 (2)      | 3223 (2)      |
| CH <sub>3</sub> str. (+) at N <sub>1</sub> | 3051 (27)                                      | 3052 (27)     | 3050 (25)     | 3052 (27)     | 3052 (27)     |
| CH <sub>3</sub> str. (+) at N <sub>3</sub> | 3044 (33)                                      | 3041 (37)     | 3042 (38)     | 3045 (28)     | 3041 (47)     |
| CH <sub>3</sub> str. (+) at N <sub>7</sub> | 3049 (26)                                      | 3049 (27)     | 3049 (26)     | 3042 (51)     | 3042 (34)     |
| (C=O) <sub>2</sub> sym. str.               | 1728 (447)                                     | 1730 (464)    | 1730 (468)    | 1727 (448)    | 1729 (465)    |
| (C=O) <sub>2</sub> asym. str.              | 1687 (915)                                     | 1688 (898)    | 1688 (893)    | 1684 (920)    | 1685 (903)    |
| C=C str.                                   | 1606 (90)                                      | 1607 (88)     | 1607 (83)     | 1604 (91)     | 1604 (90)     |
| (C=N + C=C) str.                           | 1578 (128)                                     | 1581 (132)    | 1580 (128)    | 1578 (115)    | 1581 (119)    |

Abbreviations used: (+), in phase; (-), out of phase.

**Table S 5.** Rotational constants (GHz) and zero-point vibrational energy (kcal mol<sup>-1</sup>) of the most stable conformers of caffeine

| Parameters     | Calculated values at MP2/6-311++G(d,p) level |                  |                  |                  |                  |                  |
|----------------|----------------------------------------------|------------------|------------------|------------------|------------------|------------------|
|                | Conformer<br>(A)                             | Conformer<br>(B) | Conformer<br>(C) | Conformer<br>(D) | Conformer<br>(E) | Conformer<br>(F) |
| <i>A</i> (GHz) | 1.0618291                                    | 1.0576225        | 1.0495598        | 1.0622487        | 1.0579730        | 1.0497040        |
| <i>B</i> (GHz) | 0.7037817                                    | 0.7060669        | 0.7094507        | 0.7011933        | 0.7036089        | 0.7073798        |
| <i>C</i> (GHz) | 0.4266568                                    | 0.4268161        | 0.4267240        | 0.4257872        | 0.4259891        | 0.4260128        |
| ZPVE*          | 117.87432                                    | 117.84318        | 117.79519        | 117.75489        | 117.73767        | 117.70870        |

\*values obtained at B3LYP/6-311++G(d,p) level using MP2/6-311++G(d,p) level optimized geometries.
