# Supplementary material for: Spectroscopic signatures and structural motifs in isolated and hydrated caffeine: a computational study
Source: Royal Society of Chemistry journal article supplement (doi:10.1039/c4ra09749a), 2014-01-01
Supplement: c4ra09749a3.pdf [file c4ra09749a3.pdf]

**Table S 6** Calculated structural parameters of caffeine monohydrates {Caff<sub>1</sub>-(H<sub>2</sub>O)<sub>1</sub>}.

| Parameters <sup>a</sup>     | MP2/6-311++G(d,p)              |                  |                   |                    |                   |                  |
|-----------------------------|--------------------------------|------------------|-------------------|--------------------|-------------------|------------------|
|                             | Bare caffeine<br>Conformer (A) | Conformer<br>(I) | Conformer<br>(II) | Conformer<br>(III) | Conformer<br>(IV) | Conformer<br>(V) |
| Bond lengths (Å)            |                                |                  |                   |                    |                   |                  |
| N1-C2                       | 1.4119                         | 1.4151           | 1.4151            | 1.4055             | 1.4038            | 1.4142           |
| C2-N3                       | 1.3831                         | 1.3834           | 1.3834            | 1.3771             | 1.3799            | 1.3890           |
| N3-C4                       | 1.3768                         | 1.3773           | 1.3773            | 1.3789             | 1.3789            | 1.3761           |
| C4-C5                       | 1.3870                         | 1.3899           | 1.3899            | 1.3875             | 1.3865            | 1.3865           |
| C5-C6                       | 1.4378                         | 1.4347           | 1.4347            | 1.4347             | 1.4374            | 1.4390           |
| C6-N1                       | 1.4101                         | 1.4036           | 1.4036            | 1.4036             | 1.4141            | 1.4077           |
| C5-N7                       | 1.3745                         | 1.3763           | 1.3762            | 1.3745             | 1.3743            | 1.3743           |
| N7-C8                       | 1.3637                         | 1.3617           | 1.3617            | 1.3639             | 1.3640            | 1.3602           |
| C8-N9                       | 1.3377                         | 1.3385           | 1.3386            | 1.3372             | 1.3379            | 1.3398           |
| N9-C4                       | 1.3591                         | 1.3566           | 1.3567            | 1.3584             | 1.3583            | 1.3619           |
| N1-C10                      | 1.4659                         | 1.4671           | 1.4671            | 1.4667             | 1.4698            | 1.4666           |
| C2-O11                      | 1.2241                         | 1.2229           | 1.2229            | 1.2317             | 1.2311            | 1.2220           |
| N3-C12                      | 1.4608                         | 1.4621           | 1.4621            | 1.4671             | 1.4622            | 1.4642           |
| C6-O13                      | 1.2279                         | 1.2348           | 1.2347            | 1.2268             | 1.2262            | 1.2274           |
| N7-C14                      | 1.4591                         | 1.4627           | 1.4627            | 1.4597             | 1.4597            | 1.4602           |
| C8-H1                       | 1.0819                         | 1.0820           | 1.0820            | 1.0820             | 1.0820            | 1.0820           |
| Bond angles (°)             |                                |                  |                   |                    |                   |                  |
| C2-N1-C6                    | 127.53                         | 127.04           | 127.05            | 126.99             | 126.76            | 127.05           |
| N1-C2-N3                    | 116.92                         | 116.50           | 116.49            | 117.54             | 117.39            | 116.74           |
| C2-N3-C4                    | 120.01                         | 119.50           | 119.53            | 119.32             | 119.44            | 119.13           |
| N3-C4-C5                    | 121.09                         | 121.47           | 121.47            | 121.28             | 121.10            | 121.50           |
| C4-C5-C6                    | 123.88                         | 122.91           | 123.91            | 123.59             | 123.55            | 123.53           |
| C5-C6-N1                    | 110.57                         | 111.29           | 110.28            | 110.45             | 110.69            | 110.59           |
| N9-C4-C5                    | 111.89                         | 111.99           | 111.99            | 111.88             | 111.99            | 111.28           |
| C4-C5-N7                    | 105.32                         | 105.18           | 105.18            | 105.30             | 105.26            | 105.63           |
| C5-N7-C8                    | 106.99                         | 105.89           | 105.89            | 105.95             | 105.98            | 106.18           |
| N7-C8-N9                    | 113.38                         | 113.62           | 113.61            | 113.41             | 113.38            | 113.03           |
| C8-N9-C4                    | 103.42                         | 103.30           | 103.30            | 103.44             | 103.36            | 103.87           |
| C5-C6-O13                   | 126.04                         | 126.46           | 126.47            | 126.46             | 126.33            | 126.02           |
| O13-C6-N1                   | 123.39                         | 122.25           | 122.24            | 123.06             | 122.96            | 123.38           |
| C6-N1-C10                   | 118.09                         | 117.84           | 117.87            | 117.73             | 117.29            | 117.43           |
| C10-N1-C2                   | 114.38                         | 114.38           | 114.36            | 114.78             | 115.41            | 114.65           |
| N1-C2-O11                   | 121.06                         | 120.96           | 120.96            | 120.28             | 121.44            | 120.85           |
| O11-C2-N3                   | 122.02                         | 122.50           | 122.51            | 122.17             | 121.13            | 122.36           |
| C2-N3-C12                   | 118.05                         | 118.08           | 118.09            | 119.33             | 118.25            | 118.17           |
| C12-N3-C4                   | 121.95                         | 120.77           | 120.74            | 121.33             | 121.07            | 121.06           |
| N3-C4-N9                    | 127.03                         | 126.52           | 126.52            | 126.84             | 126.90            | 127.21           |
| N9-C8-H1                    | 125.02                         | 124.93           | 124.94            | 125.00             | 125.01            | 125.03           |
| H1-C8-N7                    | 121.59                         | 121.45           | 121.44            | 121.60             | 121.61            | 121.94           |
| C8-N7-C14                   | 127.22                         | 126.53           | 126.669           | 127.19             | 127.22            | 127.09           |
| C14-N7-C5                   | 126.79                         | 127.51           | 127.55            | 126.81             | 126.77            | 126.72           |
| N7-C5-C6                    | 130.80                         | 131.58           | 131.59            | 130.74             | 130.87            | 130.55           |
| Dihedral angles (°)         |                                |                  |                   |                    |                   |                  |
| N3-C4-C5-N7                 | 179.98                         | 179.75           | 179.88            | 179.39             | 179.84            | 179.81           |
| N9-C4-C5-C6                 | 179.95                         | 175.78           | 175.93            | 175.46             | 175.81            | 175.66           |
| C=O...H-OH                  |                                | -29.41           | 30.14             | 5.25               | -5.26             |                  |
| N1-C6-O13...OH <sub>2</sub> |                                | -127.46          | 127.45            |                    |                   |                  |
| C5-C6-O13...OH <sub>2</sub> |                                | 51.33            | -51.30            |                    |                   |                  |
| N1-C2-O11...OH <sub>2</sub> |                                |                  |                   | 139.03             | 38.81             |                  |
| N3-C2-O11...OH <sub>2</sub> |                                |                  |                   | -39.60             | -143.81           |                  |
| N7-C8-N9...OH <sub>2</sub>  |                                |                  |                   |                    |                   | -159.42          |
| C5-C4-N9...OH <sub>2</sub>  |                                |                  |                   |                    |                   | 158.26           |

| Atom No.   | NBO Charge  |              |               |              |             |
|------------|-------------|--------------|---------------|--------------|-------------|
|            | Conformer I | Conformer II | Conformer III | Conformer IV | Conformer V |
| <b>O11</b> | -0.727      | -            | -0.778        | -0.778       | -0.725      |
| <b>O13</b> | -0.773      | -            | -0.721        | -0.716       | -0.721      |
| <b>N1</b>  | -0.619      | -            | -0.619        | -0.619       | -0.624      |
| <b>N3</b>  | -0.577      | -            | -0.572        | -0.574       | -0.579      |
| <b>N7</b>  | -0.442      | -            | -0.443        | -0.442       | -0.435      |
| <b>N9</b>  | -0.612      | -            | -0.606        | -0.607       | -0.657      |
| <b>C2</b>  | 1.016       | -            | 1.031         | 1.032        | 1.018       |
| <b>C4</b>  | 0.485       | -            | 0.478         | 0.473        | 0.488       |
| <b>C5</b>  | -0.088      | -            | -0.083        | -0.080       | -0.080      |
| <b>C6</b>  | 0.836       | -            | 0.821         | 0.821        | 0.821       |

**Table S 7**  
 Calculated  
 NBO  
 Charges  
 of  
 caffeine  
 monohydr  
 ates at  
 MP2/6-  
 311++G(d  
 ,p) level.

| Parameters | Calculated values at MP2/6-311++G(d,p) level |               |                |                 |                |               |
|------------|----------------------------------------------|---------------|----------------|-----------------|----------------|---------------|
|            | Conformer (A) of bare caffeine               | Conformer (I) | Conformer (II) | Conformer (III) | Conformer (IV) | Conformer (V) |
| A (GHz)    | 1.0618291                                    | 0.8001420     | 0.8000160      | 0.9585128       | 0.9874298      | 0.7257027     |
| B (GHz)    | 0.7037817                                    | 0.5296876     | 0.5296528      | 0.4430883       | 0.4321887      | 0.5518783     |
| C (GHz)    | 0.4266568                                    | 0.3348015     | 0.3348300      | 0.3119960       | 0.3121389      | 0.3178640     |
| ZPVE*      | 117.87432                                    | 133.09525     | 133.09877      | 132.92729       | 132.90136      | 133.70439     |

**Table S8** Rotational constants (GHz) and zero-point vibrational energy (kcal mol<sup>-1</sup>) of the most stable conformers of caffeine monohydrate.

\*values obtained at B3LYP/6-311++G(d,p) level using MP2/6-311++G(d,p) level optimized geometries.

**Table S9** Selected ground state vibrational stretching frequencies (cm<sup>-1</sup>) and IR intensity with tentative vibrational assignments of the most stable conformers of caffeine monohydrate

| Assignment                                 | Calculated values at B3LYP/6-311++G(d,p) level |                |                 |                |               |
|--------------------------------------------|------------------------------------------------|----------------|-----------------|----------------|---------------|
|                                            | Conformer (I)                                  | Conformer (II) | Conformer (III) | Conformer (IV) | Conformer (V) |
| (OH) <sub>2</sub> Str.( <sup>o</sup> )     | 3916(92)                                       | 3916 (92)      | 3918(93)        | 3919(97)       | 3911 (85)     |
| (OH) <sub>2</sub> Str.( <sup>o</sup> )     | 3712(480)                                      | 3713 (478)     | 3718(524)       | 3730 (526)     | 3650 (742)    |
| NH str.                                    | 3226 (2)                                       | 3226 (2)       | 3225 (2)        | 3225 (2)       | 3228 (4)      |
| CH <sub>3</sub> str. (+) at N <sub>1</sub> | 3050 (24)                                      | 3050 (24)      | 3051 (25)       | 3056 (11)      | 3051 (24)     |
| CH <sub>3</sub> str. (+) at N <sub>3</sub> | 3039 (32)                                      | 3039 (32)      | 3048 (20)       | 3040 (31)      | 3034 (29)     |
| CH <sub>3</sub> str. (+) at N <sub>7</sub> | 3049 (22)                                      | 3049 (22)      | 3049 (24)       | 3050 (26)      | 3048 (27)     |
| (C=O) <sub>2</sub> sym. str.               | 1727 (486)                                     | 1727 (486)     | 1724 (471)      | 1725 (513)     | 1733 (441)    |
| (C=O) <sub>2</sub> asym. str.              | 1675 (977)                                     | 1675 (978)     | 1674 (957)      | 1675 (881)     | 1690 (889)    |
| C=C str.                                   | 1600 (104)                                     | 1600 (104)     | 1601 (65)       | 1604 (56)      | 1606 (99)     |
| (C=N + C=C) str.                           | 1577 (91)                                      | 1577 (91)      | 1579 (126)      | 1580 (135)     | 1579 (153)    |

Abbreviations used: (+), in phase; (-), out of phase.
